# Supplementary material for: Profiling the Use of Complementary Alternative Medicines among Inflammatory Bowel Disease Patients: Results from a Single Center Survey
Source: Hindawi journal article supplement (doi:10.1155/2022/9919542), 2022-07-22
Supplement: f1 [file 9919542.f1.pdf]

# Questionnaire on Complementary and Alternative Medicine in Persons with Inflammatory Bowel Disease

## General

- Gender:  Male  Female
- Age:  <20  20-30  30-40  40-50  50-60  60-70  70-80  >80
- Highest Education:  Master  Bachelor  Secundair  Heden Schoolgaand

## Diagnosis

- Date of diagnosis (MM/YY): ..... / .....
- Type of IBD:  Ulcerative colitis  Crohn's disease  Indefinite

## Current treatment for Crohn's disease or Ulcerative colitis

- Cortisone (Medrol, Clipper, Entocort, Budenofalk, Budesonide ...)
- 5-ASA (Pentasa, Mesalazine, Claversal, Colitofalk, Mazavant, Salazopyrine )
- Anti-TNF (Remsima, Inflectra, Flixabi, Remicade, Zessly, Humira, Amgevita, Hulio, Hyrimoz, Imraldi, Idacio, Simponi)
- Stelara
- Entyvio
- Xeljanz
- Antibiotics
- Other, please specify: .....

## Alcohol use:

- Occasionally (1-2 drinks per day)
- Regular (more than 1-2 drinks per day)
- Sporadic ( < 1 drink per day)

## Smoking status:

- Not a smoker
- Ex-smoker
- Current smoker

## Aanvullende en Alternatieve Geneeskunde (AAG)

1. Have you ever used complementary and alternative medicine?:

- Yes
- No

If yes: I used this for: .....

If not:

- I am thinking of using it in the future

If yes:

- I used this before
- I do not use this currently

**2. What types of complementary and alternative medicine have you already used, and why exactly? Did you find it helpful? (check all that apply)**

|                                           |                                                                                                                                                                                                                                                                                                                                               | Already used? | Comments | Useful?<br>1. Very useful — 2. Somewhat<br>3. Not at all — 4. Don't know |
|-------------------------------------------|-----------------------------------------------------------------------------------------------------------------------------------------------------------------------------------------------------------------------------------------------------------------------------------------------------------------------------------------------|---------------|----------|--------------------------------------------------------------------------|
| Medicinal treatments<br>(duration & dose) | <input type="radio"/> Homeopathy<br><input type="radio"/> Ayurveda                                                                                                                                                                                                                                                                            |               |          |                                                                          |
| Mind-body<br>medicine                     | <input type="radio"/> Mindfulness<br><input type="radio"/> Yoga<br><input type="radio"/> Hypnotherapy<br><input type="radio"/> Acupuncture                                                                                                                                                                                                    |               |          |                                                                          |
| Nature-based<br>medicine                  | 1. Herbal products<br><input type="radio"/> Aloe Vera<br><input type="radio"/> Green tea<br><input type="radio"/> Curcumin<br><br>2. Cannabis<br><br>3. Dietary supplements<br><input type="radio"/> Vitamins<br><input type="radio"/> Minerals<br><br>4. Probiotics<br><input type="radio"/> Yoghurt<br><input type="radio"/> Other- specify |               |          |                                                                          |
| Other<br>(specify)                        |                                                                                                                                                                                                                                                                                                                                               |               |          |                                                                          |

**3. What was/is your source of complementary and alternative medicine?**

- |                                                                           |                                         |
|---------------------------------------------------------------------------|-----------------------------------------|
| <input type="radio"/> Myself                                              | <input type="radio"/> Internet & Media  |
| <input type="radio"/> Complementary and alternative medicine practitioner | <input type="radio"/> Family & Friends  |
| <input type="radio"/> Health food store                                   | <input type="radio"/> Others (specify): |

.....

**4. Why do you use Complementary and Alternative Medicine (Check all that apply)**

- Failure of classical medical treatment / dissatisfaction / less trust in the attending physicians
- Avoiding side effects of classic treatments / reducing or avoiding use of cortisone
- Positive experiences of others regarding complementary and alternative medicine
- Better control of disease
- Reducing the number of medicines I have to take
- Minimize stress and symptoms
- Prevent health problems in the future
- Cheaper
- Fear of surgery
- Last hope
- Other health benefits, namely:  
.....  
.....

**5. Have you ever discussed complementary and alternative medicine treatment with your treating gastroenterologist or IBD specialist?**

- Yes
- No

**7. Would it be beneficial (if you use CAMs) to discuss this with your gastroenterologist, if you knew that these alternative medications could interact with your current therapy?**

.....

**6. If you have never discussed this with a doctor before, why not? Tick all that apply**

- Fear of rejection by my treating physician
- Feeling that my treating doctor has too little knowledge about this
- I don't think this is necessary because complementary and alternative medicine treatments differ from classical medicine
- Others, namely:  
.....

**8. Average amount you spend annually on complementary and alternative medicine**

.....

**9. Do you think it is worth this amount?**

- Yes
- No

**10. If you have never used complementary and alternative medicine before, why not? (Not for patients taking complementary and alternative medicine) Tick all that apply**

- I am satisfied with my current successful medical treatment
- Ik ben ongerust dat aanvullende en alternatieve geneeskunde behandeling zou kunnen interfereren met mijn medische behandeling
- I think this is a waste of money
- I have too little time and knowledge about complementary and alternative medicine
- Others, namely

**11. Any other comments:**

.....
