# Supplementary material for: Profiling the Use of Complementary Alternative Medicines among Inflammatory Bowel Disease Patients: Results from a Single Center Survey
Source: Hindawi journal article supplement (doi:10.1155/2022/9919542), 2022-07-22
Supplement: f2 [file 9919542.f2.pdf]

# Vragenlijst over Aanvullende en Alternatieve Geneeskunde bij personen met een inflammatoire darmziekte

## Algemeen

- Geslacht:**     Man                     Vrouw
- Leeftijd:**     <20     20-30     30-40     40-50     50-60     60-70     70-80     >80
- Hoogste diploma:**     Master     Bachelor     Secundair     Heden Schoolgaand

## Diagnose

**Termijn sinds diagnose (MM/YY):** ...../.....

- Type IBD:**     colitis ulcerosa     ziekte van Crohn     Onbepaald

## Huidige therapie voor Crohn of colitis

- Cortisone** (Medrol, Clipper, Entocort, Budenofalk, Budesonide ...)
- 5-ASA** (Pentasa, Mesalazine, Claversal, Colitofalk, Mazavant, Salazopyrine )
- Anti-TNF** (Remsima, Inflectra, Flixabi, Remicade, Zessly, Humira, Amgevita, Hulio, Hyrimoz, Imraldi, Idacio, Simponi)
- Stelara**
- Entyvio**
- Xeljanz**
- Antibiotica**
- Andere, graag verduidelijken aub:**  
.....

## Alcohol gebruik:

- Af en toe (1-2 drankjes per dag)
- Regelmatig (meer dan 1-2 drankjes per dag)
- Sporadisch ( < 1 drankje per dag)

## Rook status:

- Nooit
- Ex-roker
- Roker

## Aanvullende en Alternatieve Geneeskunde (AAG)

**1. Hebt u ooit aanvullende en alternatieve geneeskunde gebruikt?:**

- Ja
- Neen

**Indien ja:** ik gebruikte dit voor: .....

**Indien neen:**

- ik denk eraan dit te gebruiken in de toekomst

**Indien ja:**

- ik heb dit vroeger gebruikt
- ik gebruik dit momenteel

**2. Welke types aanvullende en alternatieve geneeskunde hebt u reeds gebruikt, en waarom precies? Vond u dit nuttig? (vink alles aan wat van toepassing is)**

|                                                    |                                                                                                                                                                                                                                                                                                                                                         | REEDS GEBRUIKT? | REDEN | NUTTIG?<br>1. Heel nuttig – 2. Enigszins<br>3. Helemaal niet – 4. Weet ik niet |
|----------------------------------------------------|---------------------------------------------------------------------------------------------------------------------------------------------------------------------------------------------------------------------------------------------------------------------------------------------------------------------------------------------------------|-----------------|-------|--------------------------------------------------------------------------------|
| <b>Medicinale behandelingen (duur &amp; dosis)</b> | <input type="radio"/> Homeopathie<br><input type="radio"/> Ayurveda                                                                                                                                                                                                                                                                                     |                 |       |                                                                                |
| <b>Mind-body Geneeskunde</b>                       | <input type="radio"/> Mindfulness<br><input type="radio"/> Yoga<br><input type="radio"/> Hypnotherapie<br><input type="radio"/> Acupunctuur                                                                                                                                                                                                             |                 |       |                                                                                |
| <b>Natuurlijk gebaseerde therapieën</b>            | 1. Kruidenproducten<br><input type="radio"/> Aloe Vera<br><input type="radio"/> Groene thee<br><input type="radio"/> Kurkuma<br><br>2. Cannabis<br><br>3. Voedingssupplementen<br><input type="radio"/> Vitaminen<br><input type="radio"/> Mineralen<br><br>4. Probiotica<br><input type="radio"/> Yoghurt<br><input type="radio"/> Andere- specificeer |                 |       |                                                                                |
| <b>Andere (specificeer)</b>                        |                                                                                                                                                                                                                                                                                                                                                         |                 |       |                                                                                |

**3. Wat was/is uw bron van aanvullende en alternatieve geneeskunde ?**

- |                                                                          |                                             |
|--------------------------------------------------------------------------|---------------------------------------------|
| <input type="radio"/> Mezelf                                             | <input type="radio"/> Internet & Media      |
| <input type="radio"/> Aanvullende en alternatieve Geneeskunde beoefenaar | <input type="radio"/> Familie & Vrienden    |
| <input type="radio"/> Natuurvoedingswinkel                               | <input type="radio"/> Andere (specificeer): |

.....

**4. Waarom gebruikt u aanvullende en alternatieve geneeskunde** *Vink alles aan wat van toepassing is*

- Falen van de klassieke medische behandeling/ontevredenheid / minder vertrouwen in behandelende arts
- Vermijden van bijwerkingen van klassieke behandelingen / verminderen of gebruik van cortisone vermijden
- Positieve ervaringen van anderen i.v.m. aanvullende en alternatieve geneeskunde
- Betere controle van mijn ziekte verkrijgen
- Verminderen van het aantal geneesmiddelen dat ik moet innemen

- Verminderen stress en symptomen
- Voorkomen gezondheidsproblemen in de toekomst
- Goedkoper
- Angst voor een operatie
- Laatste hoop
- Andere gezondheidsvoordelen, namelijk:

.....  
.....

**5. Hebt u ooit aanvullende en alternatieve geneeskunde behandeling besproken met uw behandelend gastro-enteroloog of IBD specialist?**

- Ja
- Nee

**7. Zou het een meerwaarde zijn (indien je CAM's gebruikt ) dit te bespreken met je gastro-enteroloog, indien je wist dat deze alternatieve medicatie een wisselwerking kan hebben met je huidige therapie ?**

.....

**6. Indien u dit nooit eerder hebt besproken met een arts, waarom niet?** *Vink alles aan wat van toepassing is*

- Angst voor afkeuring door mijn behandelend arts
- Gevoel dat mijn behandelend arts hierover te weinig kennis heeft
- Ik vind dit niet nodig omdat aanvullende en alternatieve geneeskunde behandelingen verschillen van de klassieke geneeskunde
- Andere, namelijk: .....

**8. Gemiddeld bedrag dat u jaarlijks uitgeeft aan aanvullende en alternatieve geneeskunde**

.....

**9. Vind U dat het dit bedrag waard is?**

- Ja
- Nee

**10. Indien u nooit eerder aanvullende en alternatieve geneeskunde gebruikte, waarom niet? (Niet voor patiënten die aanvullende en alternatieve geneeskunde gebruiken)**

*Vink alles aan wat van toepassing is*

- Ik ben tevreden met mijn huidige succesvolle medische behandeling
- Ik ben ongerust dat aanvullende en alternatieve geneeskunde behandeling zou kunnen interfereren met mijn medische behandeling
- Ik vind dit geldverspilling
- Ik heb te weinig tijd en kennis over aanvullende en alternatieve geneeskunde
- Andere, namelijk

**11. Eventuele opmerkingen:**

.....
