# Supplementary material for: Profiling the Use of Complementary Alternative Medicines among Inflammatory Bowel Disease Patients: Results from a Single Center Survey
Source: Hindawi journal article supplement (doi:10.1155/2022/9919542), 2022-07-22
Supplement: f3 [file 9919542.f3.pdf]

| <b>Characteristic</b>             | <b>N</b> | <b>Overall, N =<br/>454<sup>1</sup></b> | <b>CD, N =<br/>293<sup>1</sup></b> | <b>UC, N =<br/>161<sup>1</sup></b> | <b>p-value<sup>2</sup></b> |
|-----------------------------------|----------|-----------------------------------------|------------------------------------|------------------------------------|----------------------------|
| Gender                            | 441      |                                         |                                    |                                    | 0.3                        |
| Female                            |          | 229 (52%)                               | 154 (54%)                          | 75 (49%)                           |                            |
| Male                              |          | 212 (48%)                               | 133 (46%)                          | 79 (51%)                           |                            |
| Highest educational qualification | 421      |                                         |                                    |                                    | 0.8                        |
| Currently attending school        |          | 8 (1.9%)                                | 5 (1.8%)                           | 3 (2.1%)                           |                            |
| Secondary                         |          | 184 (44%)                               | 122 (44%)                          | 62 (42%)                           |                            |
| Bachelor                          |          | 135 (32%)                               | 89 (32%)                           | 46 (32%)                           |                            |
| Master                            |          | 93 (22%)                                | 59 (21%)                           | 34 (23%)                           |                            |
| PhD                               |          | 1 (0.2%)                                | 0 (0%)                             | 1 (0.7%)                           |                            |
| Disease duration                  | 385      | 12 (5, 23)                              | 13 (5, 25)                         | 10 (3, 18)                         | 0.004                      |
| Number of treatments              | 419      |                                         |                                    |                                    | <0.001                     |
| Five                              |          | 1 (0.2%)                                | 1 (0.4%)                           | 0 (0%)                             |                            |
| Four                              |          | 1 (0.2%)                                | 0 (0%)                             | 1 (0.7%)                           |                            |
| Three                             |          | 10 (2.4%)                               | 1 (0.4%)                           | 9 (6.1%)                           |                            |
| Two                               |          | 39 (9.3%)                               | 11 (4.1%)                          | 28 (19%)                           |                            |
| One                               |          | 368 (88%)                               | 258 (95%)                          | 110 (74%)                          |                            |
| Alcohol intake                    | 382      |                                         |                                    |                                    | 0.7                        |
| More than 1 to 2 drinks per day   |          | 22 (5.8%)                               | 14 (5.8%)                          | 8 (5.7%)                           |                            |
| 1 to 2 drinks per day             |          | 81 (21%)                                | 48 (20%)                           | 33 (23%)                           |                            |
| Less than 1 drink per day         |          | 233 (61%)                               | 152 (63%)                          | 81 (57%)                           |                            |
| Not a drinker                     |          | 46 (12%)                                | 27 (11%)                           | 19 (13%)                           |                            |
| Smoking status                    | 410      |                                         |                                    |                                    | 0.009                      |
| Ex-smoker                         |          | 239 (58%)                               | 140 (54%)                          | 99 (66%)                           |                            |
| Non-smoker                        |          | 115 (28%)                               | 75 (29%)                           | 40 (27%)                           |                            |
| Smoker                            |          | 56 (14%)                                | 45 (17%)                           | 11 (7.3%)                          |                            |
| CAM use                           | 454      |                                         |                                    |                                    | 0.14                       |
| CAM_user                          |          | 185 (41%)                               | 112 (38%)                          | 73 (45%)                           |                            |
| Non-CAM_user                      |          | 269 (59%)                               | 181 (62%)                          | 88 (55%)                           |                            |
