# Supplementary figures and images for: Profiling the Use of Complementary Alternative Medicines among Inflammatory Bowel Disease Patients: Results from a Single Center Survey
Source: Hindawi journal article supplement (doi:10.1155/2022/9919542), 2022-07-22

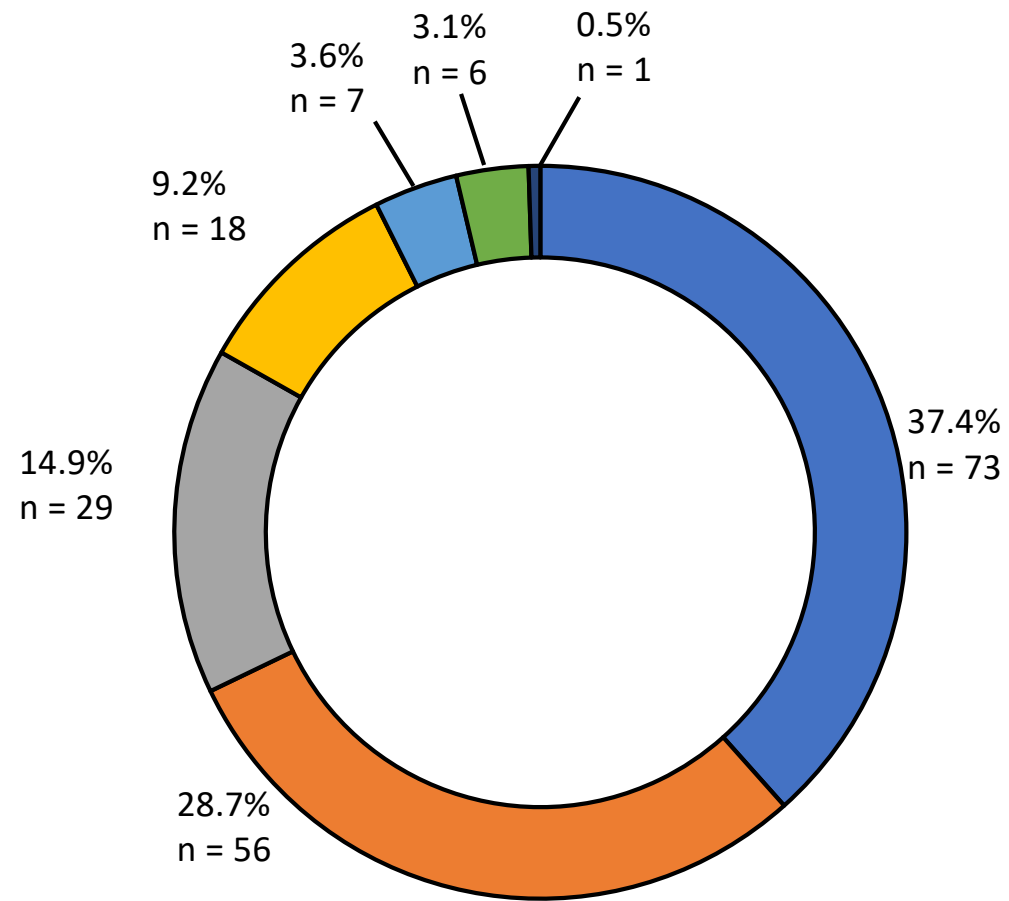

■ One ■ Two ■ Three ■ Four ■ Five ■ Six ■ Eight

# CAMs used (intermediate level classification)

Supplement: f4 [file 9919542.f4.pdf]
